# Supplementary material for: Antibacterial Activities of Selected Cameroonian Plants and Their Synergistic Effects with Antibiotics against Bacteria Expressing MDR Phenotypes
Source: Hindawi journal article supplement (doi:10.1155/2012/623723), 2012-01-01
Supplement: f1 [file 623723.f1.docx]

**Supplemental Material (S)**

S1. Activities of antibiotics in combination with the sub-inhibitory concentrations of some plants extract on *Pseudomonas aeruginosa* PA124.

| Antibiotics | Studied plant extracts, concentration and MIC values | | | | | | | | | | | | | | |
| --- | --- | --- | --- | --- | --- | --- | --- | --- | --- | --- | --- | --- | --- | --- | --- |
|  | *Garcinia lucida* seeds | | | | | *Picralima nitida* fruits | | | | | *Garcinia kola* seeds | | | | |
|  | 0 | CMI/2 | CMI/5 | CMI/10 | CMI/20 | 0 | CMI/2 | CMI/5 | CMI/10 | CMI/20 | 0 | CMI/2 | CMI/5 | CMI/10 | CMI/20 |
| ciprofloxacin | 32 | 16 (2) | 32 | 32 | 32 | 32 | 8(4) | 8(4) | 16(2) | 32 | 32 | 4(8) | 16(2) | 32 | 32 |
| chloramphénicol | 64 | 32(2) | 64 | 64 | 64 | 64 | 8(8) | 32(2) | 32(2) | 64 | 64 | 8(16) | 32(2) | 64 | 64 |
| streptomycin | 128 | 128 | 128 | 128 | 128 | - | 128 (>4) | - | - | - | 128 | 16(8) | 128 | 128 | 128 |
| ampicillin | - | 256(>2) | - | - | - | - | 16(>32) | 16(>32) | 512(>1) | - | - | 64(>8) | 256(>2) | - | - |
| tetracyclin | 8 | 4(2) | 8 | 8 | 8 | 8 | 2(4) | 4(2) | 8 | 8 | 8 | 4(2) | 8 | 8 | 8 |
| erythromycin | 128 | 64(2) | 128 | 128 | 128 | 128 | 8(16) | 8(16) | 64(2) | 128 | 128 | 32(4) | 32(4) | 128 | 128 |
| kanamycin | 128 | 128 | 128 | 128 | 128 | 128 | 64(2) | 64(2) | 128 | 128 | 128 | 16(8) | 128 | 128 | 128 |
| norfloxacin | 128 | 64(2) | 128 | 128 | 128 | 128 | 32(4) | 32(4) | 128 | 128 | 128 | 32(4) | 128 | 128 | 128 |
| cloxacyclin | - | - | - | - | - | - | 512(>1) | - | - | - | - | 64(>8) | - | - | - |
| cefepim | 512 | 512 | 512 | 512 | 512 | 512 | 512 | 512 | 512 | 512 | 512 | 128(4) | 256 | 512 | 512 |

(-) represent MIC > 512 µg/ml; MIC of the extracts [*Garcinia lucida*; 256 µg/ml; *Picralima nitida* fruits: 256 µg/ml; *Garcinia kola*: 1024 µg/ml; (in braket): Fold increase of activity

| Antibiotics | Concetration of the plant extract | Studied plant extracts, bacterial strains and FIC values | | | | | | | | | | | | | | | | | | | | |
| --- | --- | --- | --- | --- | --- | --- | --- | --- | --- | --- | --- | --- | --- | --- | --- | --- | --- | --- | --- | --- | --- | --- |
|  | *Picralima nitida fruits* | | | | | | | | | |  | *Garcinia kola* seeds | | | | | | | | | |
|  | AG100 | EA289 | KP55 | AG102 | EA3 | KP63 | EA27 | CM64 | AG100ATet | PA124 |  | AG100 | EA289 | KP55 | AG102 | EA3 | KP63 | EA27 | CM64 | AG100ATet | PA124 |
| ciprofloxacin | CMI/2 | nd | 0.25 | 0.5 | 0.5 | 0.25 | 0.5 | nd | nd | 0.125 | 0.25 |  | nd | 0.5 | 0.5 | 0.25 | 0.5 | 0.25 | nd | nd | 0.5 | 0.125 |
| CMI /5 | nd | 0.5 | 1 | 0.5 | 0.5 | 0.5 | nd | nd | 0.25 | 0.25 |  | nd | 1 | 1 | 0.25 | 0.5 | 1 | nd | nd | 0.5 | 0.5 |
| chloramphenicol | CMI/2 | 0.5 | 0.25 | 0.5 | 0.125 | 0.125 | 0.25 | 0.125 | 0.125 | <0.25 | 0.125 |  | 1 | 0.25 | 1 | 0.125 | 1 | 0.25 | 0.125 | 0.5 | <1 | 0.125 |
| CMI /5 | 1 | 0.5 | 0.5 | 0.25 | 0.25 | 0.5 | 0.5 | 0.25 | <0.125 | 0.5 |  | 1 | 0.5 | 1 | 0.25 | 1 | 0.5 | 0.25 | 1 | <1 | 0.5 |
| streptomycin | CMI/2 | 0.5 | 1 | 1 | nd | <0.125 | 1 | 1 | 0.5 | <0.5 | <0.25 |  | 0.5 | 0.5 | 0.5 | nd | nd | 1 | 0.5 | 0.5 | nd | 0.125 |
| CMI /5 | 1 | 1 | 1 | nd | 0.5 | 1 | 1 | 1 | <1 | <1 |  | 0.5 | 1 | 1 | nd | nd | 1 | 1 | 1 | nd | 1 |
| ampicillin | CMI/2 | 0.5 | 1 | 1 | 0.25 | <0.25 | nd | 1 | 1 | <1 | <0.032 |  | 0.25 | nd | nd | 0.5 | nd | <1 | 1 | <1 | nd | <0.5 |
| CMI /5 | 0.5 | 1 | 1 | 0.25 | <1 | nd | 1 | 1 | nd | <0.032 |  | 0.25 | nd | nd | 0.5 | nd | <1 | 1 | nd | nd | <0.125 |
| tetracyclin | CMI/2 | 0.25 | 0.25 | 0.5 | 0.125 | 0.125 | 0.5 | 0.25 | 0.25 | 0.5 | 0.25 |  | 0.5 | 0.25 | 0.25 | 0.25 | 0.5 | 0.25 | 0.25 | 0.5 | 0.5 | 0.5 |
| CMI /5 | 0.5 | 0.25 | 0.5 | 0.5 | 0.25 | 0.5 | 0.5 | 0.5 | 1 | 0.5 |  | 0.5 | 0.25 | 0.5 | 0.25 | 0.5 | 1 | 0.5 | 0.5 | 0.5 | 1 |
| cloxacyclin | CMI/2 | 0.5 | nd | 1 | <0.25 | nd | nd | nd | <0.5 | nd | <1 |  | 0.5 | nd | nd | nd | nd | nd | 0.25 | <1 | nd | 0.125 |
| CMI /5 | 0.5 | nd | 1 | <0.5 | nd | nd | nd | nd | nd | nd |  | 1 | nd | nd | nd | nd | nd | 1 | nd | nd | nd |
| kanamycin | CMI/2 | nd | 0.5 | 0.25 | 1 | nd | 0.25 | <1 | nd | 0.25 | 0.5 |  | nd | 0.5 | 0.125 | 1 | nd | 0.5 | <1 | nd | 0.125 | 0.125 |
| CMI /5 | nd | 0.5 | 0.25 | 1 | nd | 1 | nd | nd | 0.5 | 0.5 |  | nd | 1 | 0.25 | 1 | nd | 1 | nd | nd | 0.5 | 1 |
| erythromycin | CMI/2 | 0.5 | 1 | 0.25 | 1 | 0.25 | 0.5 | 0.5 | 0.125 | 0.5 | 0.063 |  | 0.25 | 1 | 1 | 1 | 0.25 | 0.125 | 0.5 | 0.063 | 0.125 | 0.25 |
| CMI /5 | 1 | 1 | 0.5 | 1 | 0.5 | 1 | 1 | 1 | 0.5 | 0.063 |  | 1 | 1 | 1 | 1 | 0.25 | 0.25 | 1 | 0.125 | 1 | 0.25 |
| norfloxacin | CMI/2 | 0.5 | 0.5 | 0.5 | 0.25 | 0.25 | 0.063 | 0.5 | 0.5 | 0.25 | 0.25 |  | 0.25 | 0.5 | 0.25 | 0.5 | 0.5 | 0.125 | 0.25 | 0.25 | 0.25 | 0.25 |
| CMI /5 | 1 | 0.5 | 0.5 | 0.5 | 0.25 | 0.25 | 0.5 | 1 | 0.25 | 0.25 |  | 0.5 | 0.5 | 1 | 0.5 | 0.5 | 0.25 | 1 | 0.5 | 0.5 | 1 |
| cefepim | CMI/2 | 0.5 | 1 | 1 | 1 | 0.25 | 0.5 | 0.5 | <0.5 | 0.25 | 1 |  | nd | 1 | nd | nd | nd | 0.5 | nd | nd | nd | 0.25 |
| CMI /5 | 1 | 1 | 1 | 1 | 0.5 | 1 | 1 | nd | 1 | 1 |  | nd | 1 | nd | nd | nd | 1 | nd | nd | nd | 0.5 |

S2. FIC of different antibiotics after the association of the extracts of *P. nitida* fruits and seeds of *G. kola* at the concentrations MIC/2, MIC/5 against ten MDR bacteria strains.

(nd): Non determined Values of FIC;There is synergy when FIC ≤ 0.5. indifference when 0.5<FIC < 4. and antagonism. when FIC>4.
